# Supplementary material for: Effects of Chemical Activation Conditions on Hierarchical Porous Carbon via Oxytetracycline Adsorption
Source: MDPI journal article supplement (doi:10.3390/w15173146), 2023-09-02
Supplement: s1 [file s1]

# Supplementary Information

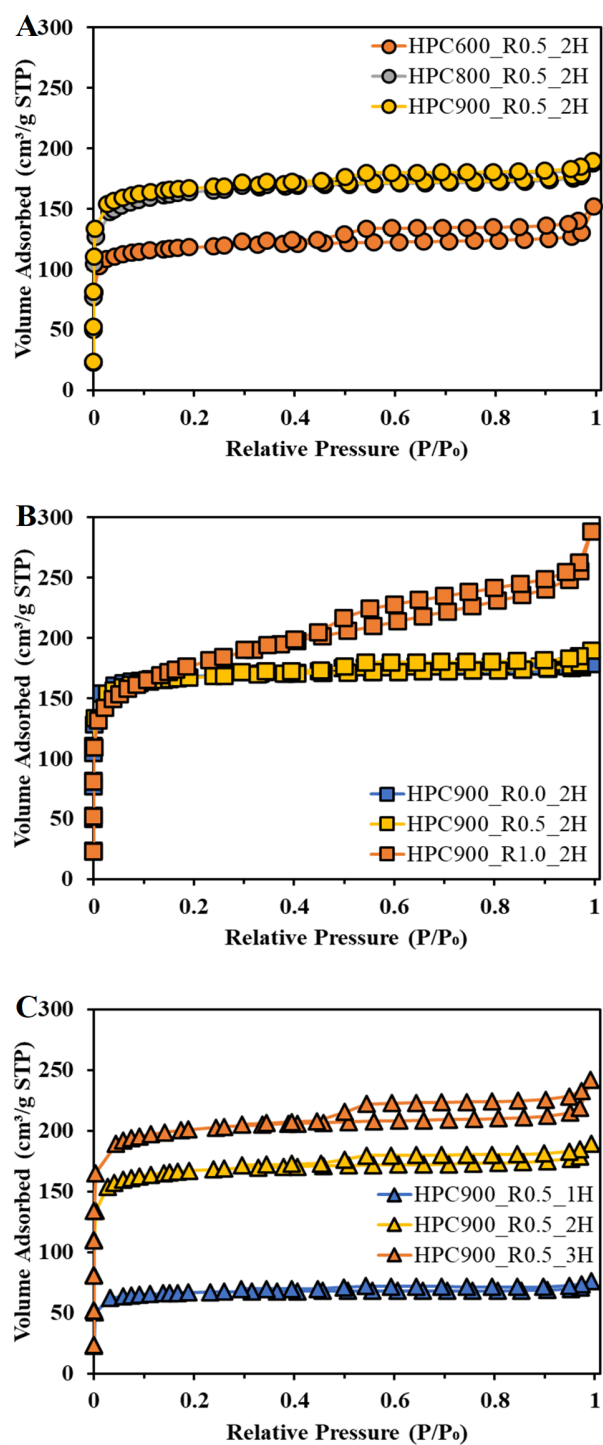

**Figure S1.** N<sub>2</sub> adsorption–desorption isotherms of HPCs by (A) temperature effect, (B) ratio effect, (C) activation time effect.

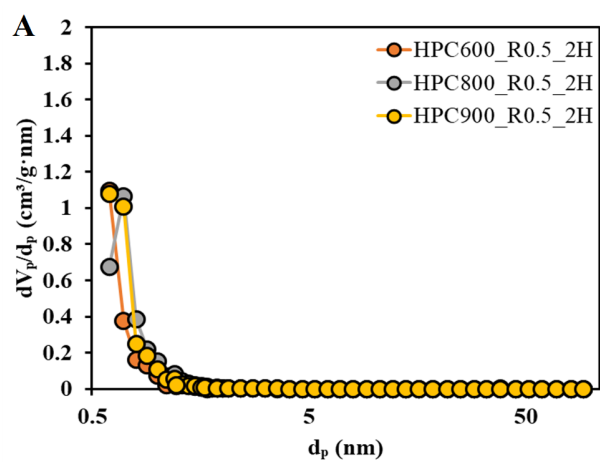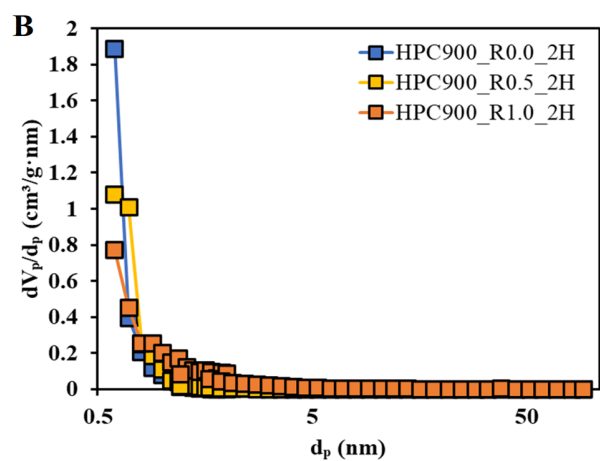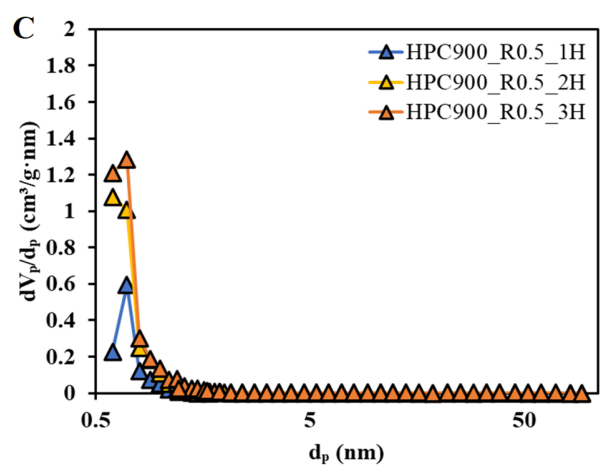

**Figure S2.** Pore size distribution of HPCs by (A) temperature effect, (B) ratio effect, (C) activation time effect.

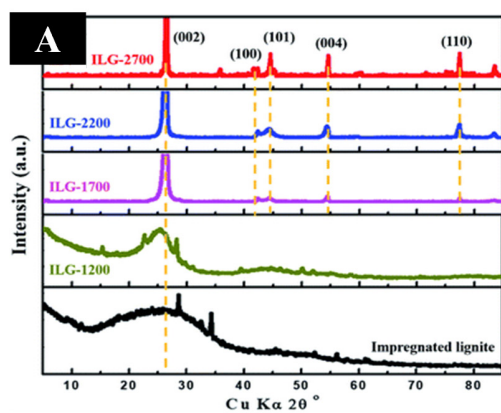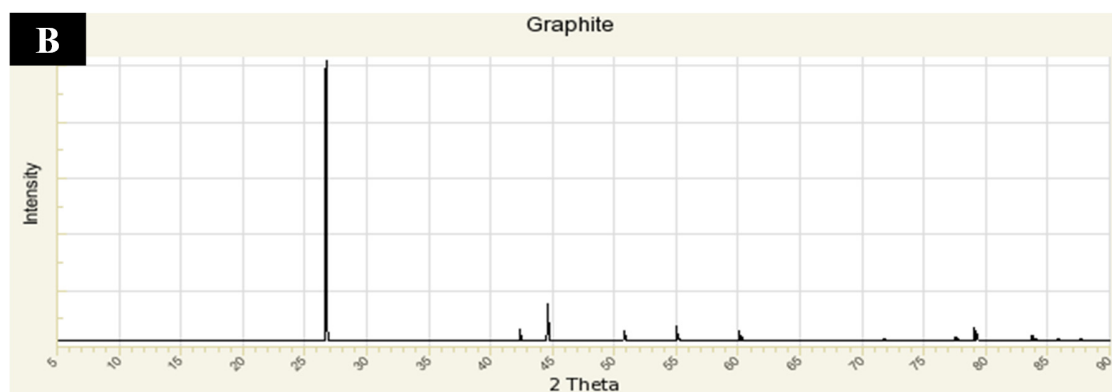

**Figure S3.** XRD patterns of graphitic structure in (A) Yang et al. 2019 [1] and in (B) <https://rruff.info/Graphite/R090047s> (accessed on Aug. 06, 2023).

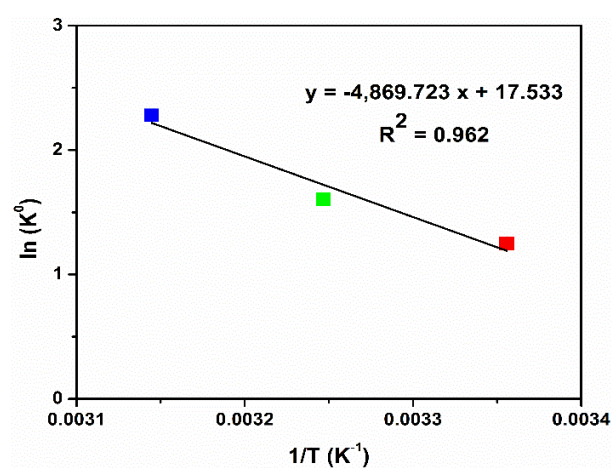

**Figure S4.**  $\ln(K^0)$  vs.  $1/T$  plot for HPC900\_R1\_2H.

**Table S1.** Comparison of the maximum OTC adsorption performance of different adsorbents.

| No. | Adsorbent                                                                      | Maximum Adsorption Capacity (mg/g) | Reference |
|-----|--------------------------------------------------------------------------------|------------------------------------|-----------|
| 1   | g-C <sub>3</sub> N <sub>4</sub>                                                | 11.30                              | [2]       |
| 2   | LaFeO <sub>3</sub> /g-C <sub>3</sub> N <sub>4</sub>                            | 93.52                              | [2]       |
| 3   | LaFeO <sub>3</sub>                                                             | 74.12                              | [2]       |
| 4   | Coconut shell biochar                                                          | 71.93                              | [3]       |
| 5   | Pickling biochar                                                               | 113.37                             | [3]       |
| 6   | Corn straw biochar                                                             | 47.89                              | [4]       |
| 7   | Vitamin B6-coated corn straw biochar                                           | 52.79                              | [4]       |
| 8   | Ni <sub>3</sub> S <sub>4</sub> /Ag <sub>2</sub> S/TiO <sub>2</sub> /CA aerogel | 29.57                              | [5]       |
| 9   | Poplar leaf                                                                    | 59.50                              | [6]       |
| 10  | Poplar leaf/KHCO <sub>3</sub>                                                  | 141.00                             | [6]       |
| 11  | S-TiO <sub>2</sub> /WS <sub>2</sub> /alginate beads                            | 27.69                              | [7]       |
| 12  | Wheat flour/NaHCO <sub>3</sub>                                                 | 87.18                              | This work |

## References

1. Yang, J.-G.; Bai, X.-J.; Wang, Y.-L. The preparation of synthetic graphite materials with hierarchical pores from lignite by one-step impregnation and their characterization as dye absorbents. *RSC Adv* 2019, 9, 12737-12746, doi: 10.1039/C9RA00343F.
2. Xu, K.; Yang, X.; Ruan, L.; Qi, S.; Liu, J.; Liu, K.; Pan, S.; Feng, G.; Dai, Z.; Yang, X.; et al. Superior Adsorption and Photocatalytic Degradation Capability of Mesoporous LaFeO<sub>3</sub>/g-C<sub>3</sub>N<sub>4</sub> for Removal of Oxytetracycline. *Catalysts* 2020, 10, doi:10.3390/catal10030301.
3. Li, Q.; Zhao, S.; Wang, Y. Mechanism of Oxytetracycline Removal by Coconut Shell Biochar Loaded with Nano-Zero-Valent Iron. *Int J Environ Res Public Health* 2021, 18, doi:10.3390/ijerph182413107.
4. Xin, Y.; Zhang, P.; Shen, J.; Ren, S. Development of Vitamin B6-Mediated Biochar with Nano Zero-Valent Iron Coating for Oxytetracycline Removal through Adsorption and Degradation under Harsh Acidic Conditions. *Water* 2022, 14, doi:10.3390/w14172734.
5. Kumar, R.; Oves, M.; Ansari, M.O.; Taleb, M.A.; Baraka, M.A.E.; Alghamdi, M.A.; Makishah, N.H.A. Biopolymeric Ni(3)S(4)/Ag(2)S/TiO(2)/Calcium Alginate Aerogel for the Decontamination of Pharmaceutical Drug and Microbial Pollutants from Wastewater. *Nanomaterials (Basel)* 2022, 12, doi:10.3390/nano12203642.
6. Wei, Z.; Hou, C.; Gao, Z.; Wang, L.; Yang, C.; Li, Y.; Liu, K.; Sun, Y. Preparation of Biochar with Developed Mesoporous Structure from Poplar Leaf Activated by KHCO<sub>3</sub> and Its Efficient Adsorption of Oxytetracycline Hydrochloride. *Molecules* 2023, 28, doi:10.3390/molecules28073188.
7. Kumar, R.; Ansari, M.O.; Taleb, M.A.; Oves, M.; Barakat, M.A.; Alghamdi, M.A.; Al Makishah, N.H. Integrated Adsorption-Photocatalytic Decontamination of Oxytetracycline from Wastewater Using S-Doped TiO<sub>2</sub>/WS<sub>2</sub>/Calcium Alginate Beads. *Catalysts* 2022, 12, doi:10.3390/catal12121676.
